# Supplementary figures and images for: Characterizing aptamer small molecule interactions with backscattering interferometry
Source: Royal Society of Chemistry journal article supplement (doi:10.1039/c4an01227e), 2014-08-20

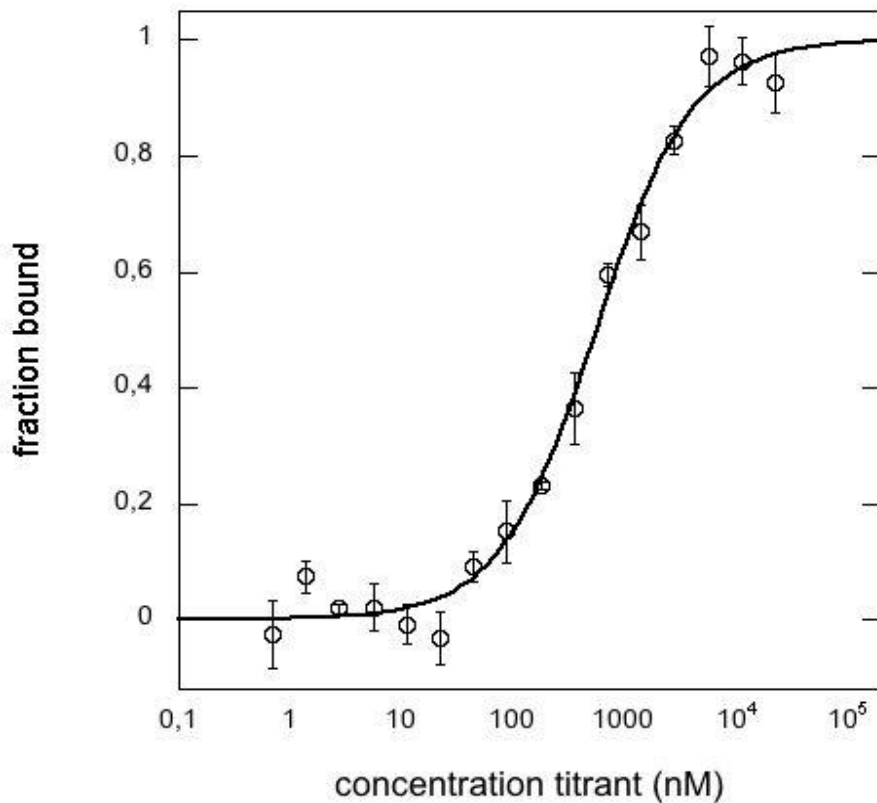

Figure S1: MST assay for ampicillin binding Ampicillin284 with a  $K_d$  of  $569.8 \pm 76.2$  nM and an  $R^2$  of 0.990.

Supplement: c4an01227e1.pdf [file c4an01227e1.pdf]
